# Supplementary material
Source: publisher site journal article supplement (https://www.spandidos-publications.com/7420/downloadSupplementary)
Supplement: Supplementary file 1 [file downloadSupplementary]

Table SI. Sequences of PCR primers used in the study.

| Primer            | Sequence                                                                         |
|-------------------|----------------------------------------------------------------------------------|
| Nrf2 (Human)      | Forward, 5'-CACATCCAGTCAGAAACCAGTGG-3';<br>Reverse, 5'-GGAATGTCTGCGCCAAAAGCTG-3' |
| HO-1 (Human)      | Forward, 5'-AAGACTGCGTTCCTGCTCAAC-3';<br>Reverse, 5'-AAAGCCCTACAGCAACTGTCTG-3'   |
| NLRP3 (Human)     | Forward, 5'-GGACTGAAGCACCTGTTGTGCA-3';<br>Reverse, 5'-TCCTGAGTCTCCCAAGGCATTC-3'  |
| Caspase-1 (Human) | Forward, 5'-GCTGAGGTTGACATCACAGGCA-3';<br>Reverse, 5'-TGCTGTCAGAGGTCTTGTGCTC-3'  |
| ASC (Human)       | Forward, 5'-AGCTCACCGCTAACGTGCTGC-3';<br>Reverse, 5'-GCTTGGCTGCCGACTGAGGAG-3'    |
| GSDMD (Human)     | Forward, 5'-ATGAGGTGCCTCCACAACCTCC-3';<br>Reverse, 5'-CCAGTTCCTTGGAGATGGTCTC-3'  |
| GAPDH (Human)     | Forward, 5'-CTCCTCCTGTTTCGACAGTCAGC-3';<br>Reverse, 5'-CCCAATACGACCAAATCCGTT-3'  |
